# Supplementary material
Source: HighWire-hosted journal article supplement (https://bmjopen.bmj.com/content/8/9/e022086)
Supplement: inline-supplementary-material-1 [file inline-supplementary-material-1.pdf]

## Appendix 1. Database Search Strategy

### A. MEDLINE(OVID) Search Strategy

- #1 shoulder pain/
- #2 shoulder impingement syndrome/
- #3 rotator cuff/
- #4 exp bursitis/
- #5 ((shoulder\$ or rotator cuff) adj5 (bursitis or frozen or impinge\$ or tendinitis or tendonitis or tendinopathy or pain\$)).mp.
- #6 rotator cuff.mp.
- #7 adhesive capsulitis.mp.
- #8 or/1-7
- #9 ARTHROPLASTY, SUBCHONDRAL/
- #10 ('microfracture\*' or 'bone marrow stimulat\*' or 'marrow-stimulat\*' or 'channel\*' or 'drill\*' or 'decorticat\*').mp.
- #11 or/9-10
- #12 8 and 11
